# Supplementary material for: Triphenylphosphonium (TPP)-Conjugated Quinolone Analogs Displayed Significantly Enhanced Fungicidal Activity Superior to Its Parent Molecule
Source: MDPI journal article supplement (doi:10.3390/jof9060685), 2023-06-19

**Supplementary Table S1.** IC<sub>50</sub> value of MitoQNO<sub>11</sub> and pyrimorph on cytochrome *bc*<sub>1</sub> complex of *P. capsici*.

|                       | EC <sub>50</sub> | R <sup>2</sup> | Toxicity regression equations |
|-----------------------|------------------|----------------|-------------------------------|
| MitoQNO <sub>11</sub> | 3.33±0.29        | 0.989          | Y=1.24X-0.65                  |
| Primorph              | 6.89±2.16        | 0.996          | Y=1.48X-1.24                  |

**Supplementary Figure S1.** Spectra of title compounds.

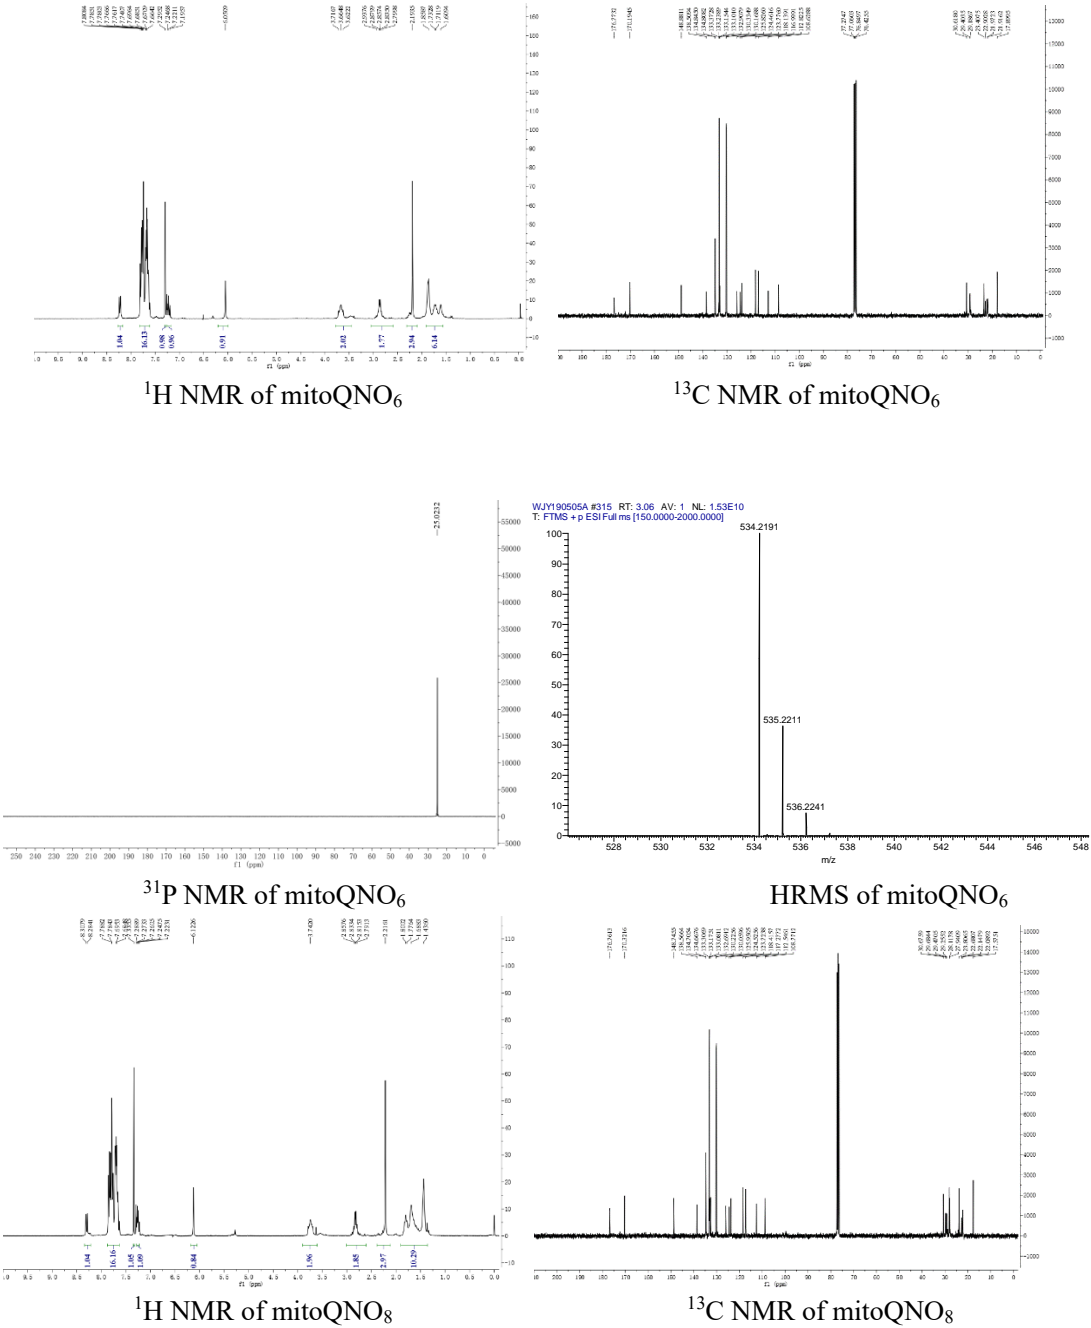

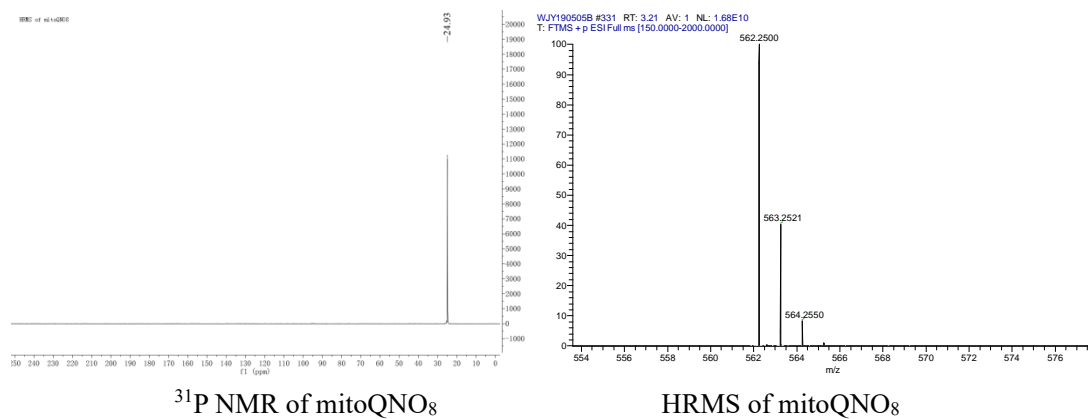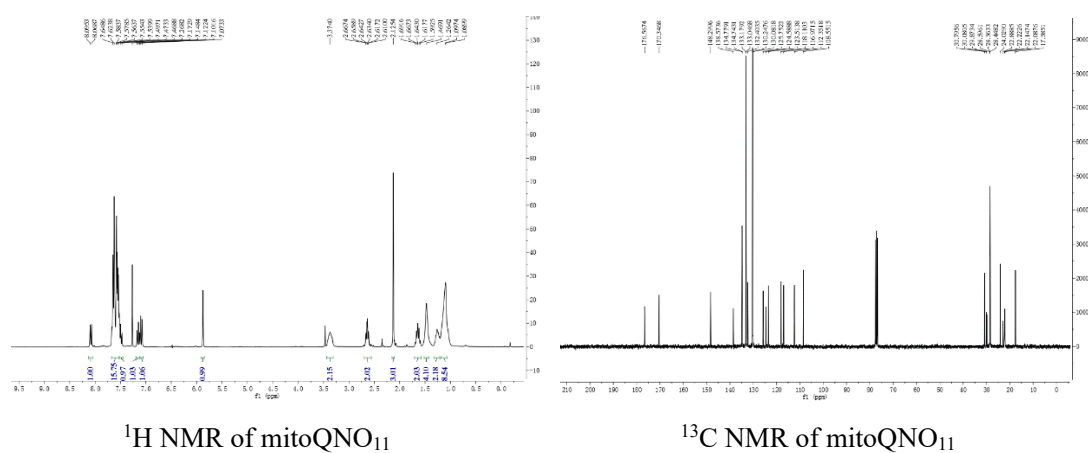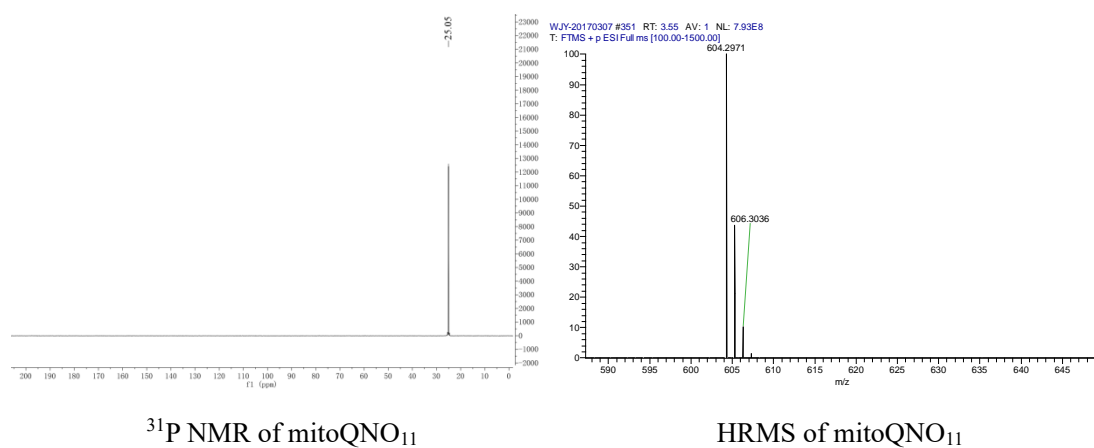

Supplement: s1 [file s1]
